# Supplementary material
Source: PubMed Central journal article supplement (PMC2748681)
Supplement: NIHMS102791-supplement-Supplemental_Data.pdf [file NIHMS102791-supplement-Supplemental_Data.pdf]

**SUPPLEMENTAL MATERIAL**

**Table SI. Oligonucleotides used in this study.**

| Name       | Use                       | Sequence                                                                                                 |
|------------|---------------------------|----------------------------------------------------------------------------------------------------------|
| Cyclin D1  | Real-time RT-PCR          | F : 5'-ATGCAAGGCCTGAACCTG-3'<br>R: 5'-TCCTCCTCAGTGGCCTTG-3'                                              |
| Cyclin D2  | Real-time RT-PCR          | F: 5'-TACCCGCCATCGATGATT-3'<br>R: 5'-CTTGGATCCGGCGTTATG-3'                                               |
| NOR1       | Real-time RT-PCR          | F: 5'-AGACGCCGAAACCGATGT-3'<br>R: 5'-CTCGGACAAGGGCATTCA-3'                                               |
| Nur77      | Real-time RT-PCR          | F: 5'-CTTCGGCGTCCTTCAAGT-3'<br>R: 5'-GGGAGAAGTGGCCAAATG-3'                                               |
| Nurr1      | Real-time RT-PCR          | F: 5'-GCCTAGCTGTTGGGATGG-3'<br>R: 5'-TTGCCTGGAACCTGGAAT-3'                                               |
| TFIIB      | Real-time RT-PCR          | F: 5'-CTCTCCCAAGCGTCACATGTCC-3'<br>R: 5'-CAATAACTCGGTCCCCTACAAC-3'                                       |
| hCyclin D1 | Site-directed mutagenesis | F: 5'-TCAGTCCCAGGGCAAATTCTAAAGAAGAAGGGACGTCTACA-3'<br>R: 5'-TGTAGACGTCCCTTCTTCTTTAGAATTTGCCCTGGGACTGA-3' |
| mCyclin D1 | Site-directed mutagenesis | F: 5'-GGCCTTTTGTCTCCAAAAGAACAAGTACAAATAAGCGCAG-3'<br>R: 5'-CTGCGCTTATTTGTCAGTGTCTTTTGGAGACAAAAGGCC-3'    |
| hCyclin D1 | EMSA                      | F: 5'-AATTCTAAAGGTGAAGGGAC-3'<br>R: 5'-GTCCCTTCACCTTTAGAATT-3'                                           |
| mCyclin D1 | EMSA                      | F: 5'-TCTCCAAAAGGTCAGTACTGACA-3'<br>R: 5'-TGTCAGTCACCTTTTGGAGA-3'                                        |
| hCyclin D1 | Real-time ChIP PCR        | F: 5'-CCCCTCACGCTCACGAAT-3'<br>R: 5'-CCCTCTGCCTGGGACAAG-3'                                               |
| mCyclin D1 | Real-time ChIP PCR        | F: 5'-GGCAGGAAATCCGAAAGG-3'<br>R: 5'-CTGTCCGCTCTGGGCTTA-3'                                               |
